# Supplementary material for: Herpes Simplex Virus Dances with Amyloid Precursor Protein while Exiting the Cell
Source: PubMed Central journal article supplement (PMC3069030; doi:10.1371/journal.pone.0017966), 2011-03-31
Supplement: pone.0017966.s009.pdf [file pone.0017966.s009.pdf]

## SUPPORTING TABLE

**Table S1. Comparison of movements of VP26-GFP and APP-mRFP singly and together\***

|                         | Average instantaneous velocity (AIV) ( $\mu\text{m/s}$ ) | Range of AIV ( $\mu\text{m/s}$ ) | Maximal velocity ( $\mu\text{m/s}$ ) | Pauses          |              | Run length ( $\mu\text{m}$ ) |
|-------------------------|----------------------------------------------------------|----------------------------------|--------------------------------------|-----------------|--------------|------------------------------|
|                         |                                                          |                                  |                                      | % Total time    | Duration (S) |                              |
| <b>Infected cells</b>   |                                                          |                                  |                                      |                 |              |                              |
| VP26 and APP (n=118)    | 0.4 $\pm$ 0.1                                            | 0.3-1.0                          | 2.0                                  | 30.2 $\pm$ 12.0 | 3-24         | 0.5-30.1                     |
| VP26 alone (n=15)       | 0.3 $\pm$ 0.1                                            | 0.2-0.3                          | 1.2                                  | 25.9 $\pm$ 8.3  | 3-6          | 0.5-11.5                     |
| APP alone (n=64)        | 0.3 $\pm$ 0.1                                            | 0.2-0.4                          | 1.3                                  | 22.5 $\pm$ 7.5  | 3-39         | 0.5-23.7                     |
| <b>Uninfected cells</b> |                                                          |                                  |                                      |                 |              |                              |
| APP alone (n=23)        | 1.1 $\pm$ 0.2                                            | 0.3-1.3                          | 4.2                                  | 4.4 $\pm$ 1.2   | 3-12         | 13.2-149.7                   |

\* Movements of VP26GFP-HSV particles alone or with APP-mRFP and of APP-mRFP vesicles alone inside infected or uninfected cells were measured using MetaMorph from at least 3 different cells in independent movies. Particles moving through at least 3 frames are designated as moving particles. Only particles moving into and out of a frame were measured.
